# Supplementary material for: Fabrication of N-doped and shape-controlled porous monolithic carbons from polyacrylonitrile for supercapacitors
Source: Royal Society of Chemistry journal article supplement (doi:10.1039/c7ra07003a), 2017-01-01
Supplement: c7ra07003a1.pdf [file c7ra07003a1.pdf]

## Supporting Information

### Fabrication of N-doped and shape-controlled porous monolithic carbons from polyacrylonitrile for supercapacitors

Yu Shu,<sup>a</sup> Jun Maruyama,<sup>b</sup> Satoshi Iwasaki,<sup>b</sup> Shohei Maruyama,<sup>b</sup> Yehua Shen<sup>c</sup> and Hiroshi Uyama<sup>\*ac</sup>

<sup>a</sup> *Department of Applied Chemistry, Graduate School of Engineering, Osaka University, Suita, Osaka 565-0871, Japan*

<sup>b</sup> *Research Division of Environmental Technology, Osaka Research Institute of Industrial Science and Technology, 1-6-50 Morinomiya, Joto-ku, Osaka 536-8553, Japan*

<sup>c</sup> *Key Laboratory of Synthetic and Natural Functional Molecule Chemistry of Ministry of Education, College of Chemistry and Materials Science, Northwest University, Xi'an, Shaanxi Province, 710127, PR China*

Email: uyama@chem.eng.osaka-u.ac.jp

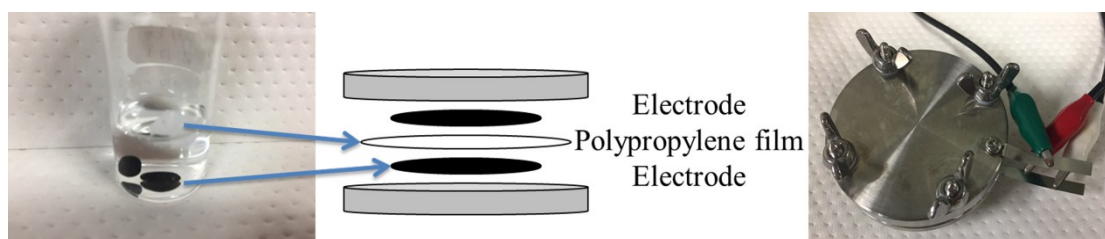

**Figure S1** Scheme illustration of the as-assembled two-electrode symmetric supercapacitor by a 2E-CELL-SUS cell.

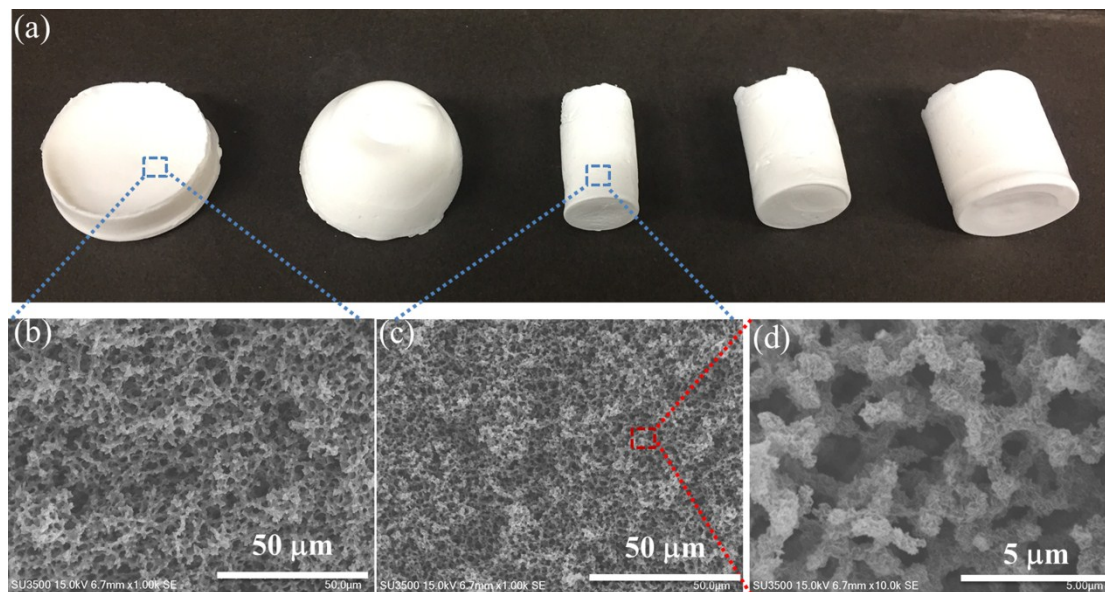

**Figure S2** PM fabricated by the TIPS approach with various shapes (a), SEM images of the obtained PM (b-d).

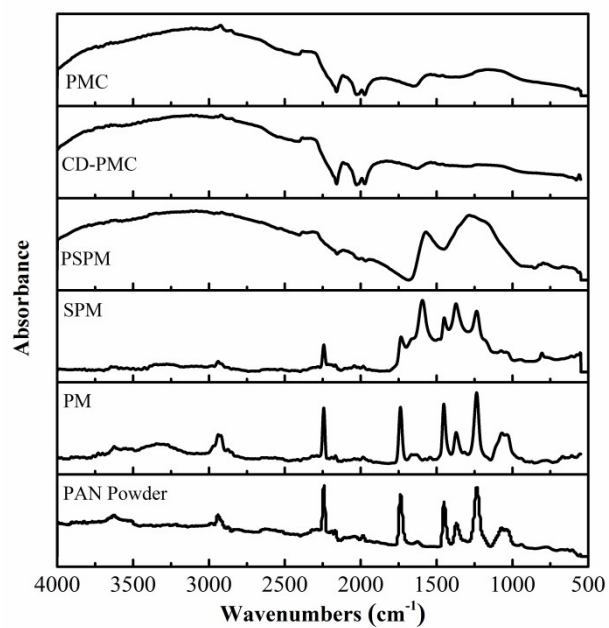

**Figure S3** FTIR spectrum of all related products from the raw PAN powder to PMC.

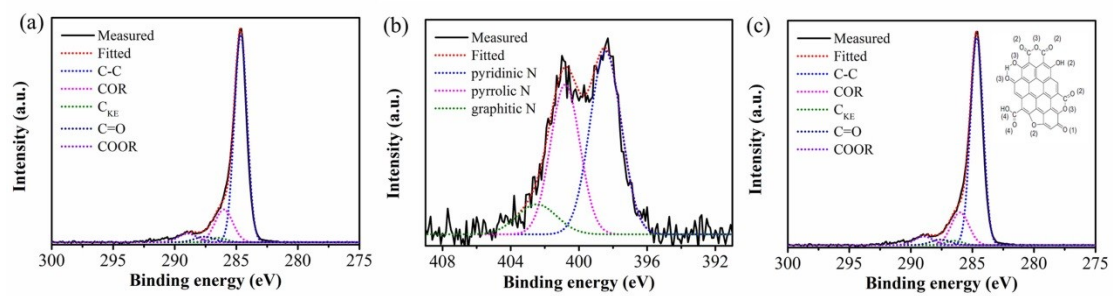

**Figure S4** High-resolution XPS spectra and fitted data of C 1s peak (d), N 1s peak (e), and O 1s peak (f) for CD-PMC.

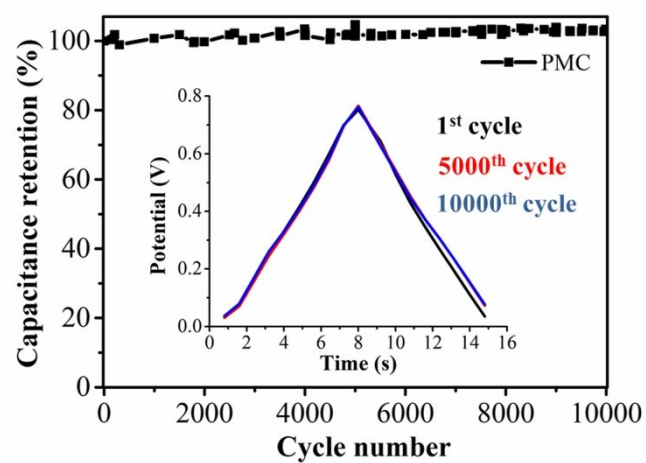

**Figure S5** Capacitance retention of PMC from GCD curves at a constant current density of  $20 \text{ A g}^{-1}$  for 10000 cycles with the 1<sup>st</sup>, 5000<sup>th</sup>, and 10000<sup>th</sup> cycles inset.

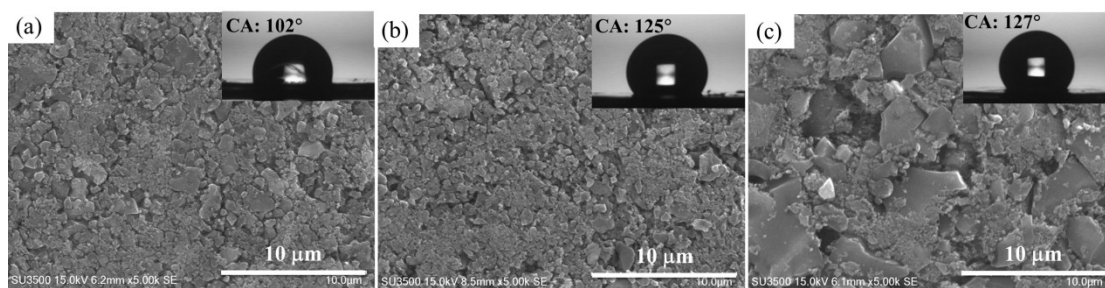

**Figure S6** SEM images of electrode films synthesized by PMC (a), CD-PMC (b), and YP-50F (c) with the inset of contact angle results for 1 M H<sub>2</sub>SO<sub>4</sub> aqueous electrolyte.
